# Supplementary material
Source: MDPI journal article supplement (https://www.mdpi.com/2076-3417/13/8/5001)
Supplement: s1 [file s1]

*Supplementary*

**Table S1:** Evolution of the IRF in the years 1996, 2007, 2015 and 2020 by province and change between 1996 and 2020.

| Provinces   |        | 1996  | 2007  | 2015  | 2020  | $\Delta$ 1996–2020 |
|-------------|--------|-------|-------|-------|-------|--------------------|
| El oro      | Mean   | 71.28 | 70.79 | 68.72 | 68.15 | -4.39              |
|             | Median | 67.06 | 67.60 | 65.80 | 64.09 | -4.42              |
|             | S.D    | 18.05 | 17.92 | 17.55 | 19.58 | 8.45               |
| Manabi      | Mean   | 87.53 | 86.70 | 84.47 | 89.20 | 1.91               |
|             | Median | 92.74 | 90.41 | 85.30 | 95.16 | 2.60               |
|             | S.D    | 13.48 | 14.30 | 14.65 | 13.57 | 0.63               |
| Guayas      | Mean   | 60.12 | 58.16 | 55.79 | 59.01 | -1.85              |
|             | Median | 59.11 | 56.91 | 54.76 | 57.54 | -2.66              |
|             | S.D    | 26.69 | 26.37 | 25.27 | 25.89 | -3.02              |
| Galapagos   | Mean   | 89.77 | 89.77 | 89.69 | 93.01 | 3.61               |
|             | Median | 93.40 | 93.40 | 93.22 | 99.41 | 6.43               |
|             | S.D    | 11.88 | 11.88 | 11.88 | 10.80 | -9.10              |
| Esmeraldas  | Mean   | 69.04 | 70.52 | 68.73 | 72.51 | 5.02               |
|             | Median | 73.47 | 76.59 | 71.00 | 79.12 | 7.69               |
|             | S.D    | 24.34 | 24.82 | 24.49 | 25.20 | 3.55               |
| Santa Elena | Mean   |       |       |       | 79.97 |                    |
| Total       | Mean   | 69.54 | 68.50 | 66.66 | 73.80 | 6.12               |
|             | Median | 72.73 | 70.27 | 67.19 | 79.39 | 9.16               |
|             | S.D    | 25.56 | 25.74 | 25.47 | 25.62 | 0.25               |

**Table S2:** Evolution of the Flux in the years 1996 and 2020 by province and change between 1996 and 2020.

| Provinces   |        | 1996               | 2020               | $\Delta$ 1996–2020 |
|-------------|--------|--------------------|--------------------|--------------------|
| El oro      | Mean   | $6.18 \times 10^7$ | $9.68 \times 10^7$ | 56.48              |
|             | Median | $7.48 \times 10^7$ | $1.01 \times 10^8$ | 34.64              |
|             | S.D    | $3.13 \times 10^7$ | $2.44 \times 10^7$ | –22.21             |
| Manabí      | Mean   | $6.86 \times 10^6$ | $7.95 \times 10^6$ | 15.80              |
|             | Median | $5.82 \times 10^6$ | $7.95 \times 10^6$ | 36.51              |
|             | S.D    | $3.53 \times 10^6$ | $3.43 \times 10^6$ | –2.73              |
| Guayas      | Mean   | $1.34 \times 10^8$ | $2.05 \times 10^8$ | 52.49              |
|             | Median | $5.91 \times 10^7$ | $2.16 \times 10^8$ | 265.36             |
|             | S.D    | $1.24 \times 10^8$ | $1.10 \times 10^8$ | –11.32             |
| Galapagos   | Mean   | $1.01 \times 10^6$ | $9.41 \times 10^5$ | –7.26              |
|             | Median | $3.33 \times 10^5$ | $2.70 \times 10^5$ | –18.97             |
|             | S.D    | $1.37 \times 10^6$ | $1.71 \times 10^6$ | 25.30              |
| Esmeraldas  | Mean   | $5.42 \times 10^7$ | $6.36 \times 10^7$ | 17.27              |
|             | Median | $1.22 \times 10^7$ | $6.74 \times 10^7$ | 450.20             |
|             | S.D    | $5.64 \times 10^7$ | $5.02 \times 10^7$ | –11.04             |
| Santa Elena | Mean   | -                  | $1.67 \times 10^5$ | -                  |
|             | Median | -                  | $2.00 \times 10^5$ | -                  |
|             | S.D    | -                  | $9.36 \times 10^4$ | -                  |
| Total       | Mean   | $7.71 \times 10^7$ | $8.77 \times 10^7$ | 13.69              |
|             | Median | $4.45 \times 10^7$ | $5.89 \times 10^7$ | 32.60              |
|             | S.D    | $9.54 \times 10^7$ | $1.01 \times 10^8$ | 6.08               |
